# Supplementary material for: Ku-gaa-gii pimitizi-win , the COVID-19 cohort study of people experiencing homelessness in Toronto, Canada: a study protocol
Source: HighWire-hosted journal article supplement (doi:10.1136/bmjopen-2022-063234), 2022-08-01
Supplement: bmjopen-2022-063234supp004_data_supplement.pdf [file bmjopen-2022-063234supp004_data_supplement.pdf]

## Supplement 4: Adjudication of serological and self-report data into past infection and vaccination status

Our serologic assays detect total IgG antibodies against three SARS-CoV-2 antigens: Nucleocapsid (NP), Spike protein (SMT1) and Receptor-binding domain (RBD). Antibodies against NP indicate past infection, whereas antibodies against SMT1 and RBD indicate immunization and/or past infection.

For each sample, raw values of IgG antibody levels were normalized to a reference point on a standard curve run on the same assay plate. The thresholds for positivity were set at 3 standard deviations below the mean of a log distribution of negative control samples. Sensitivity and specificity at these thresholds were determined by applying a confusion matrix to a set of 560 negative control samples (obtained prior to the advent of COVID-19) and 392 positive controls samples obtained from PCR-confirmed cases at least 2 weeks after symptom onset. Sensitivity and specificity were 0.99 and 0.79, respectively, for antibodies against NP; 0.99 and 0.97 for antibodies against SMT1; and 1.0 and 0.89 for antibodies against RBD.

Because our samples are collected during a period when both infections and vaccinations occur, we followed the decision tree in Step 1 to summarize serological results, and the decision matrix in Step 2 to combine serologic results and self-report data to assign infection status and vaccination status for each participant.

## Step 1 - Decision tree to summarize serological data results

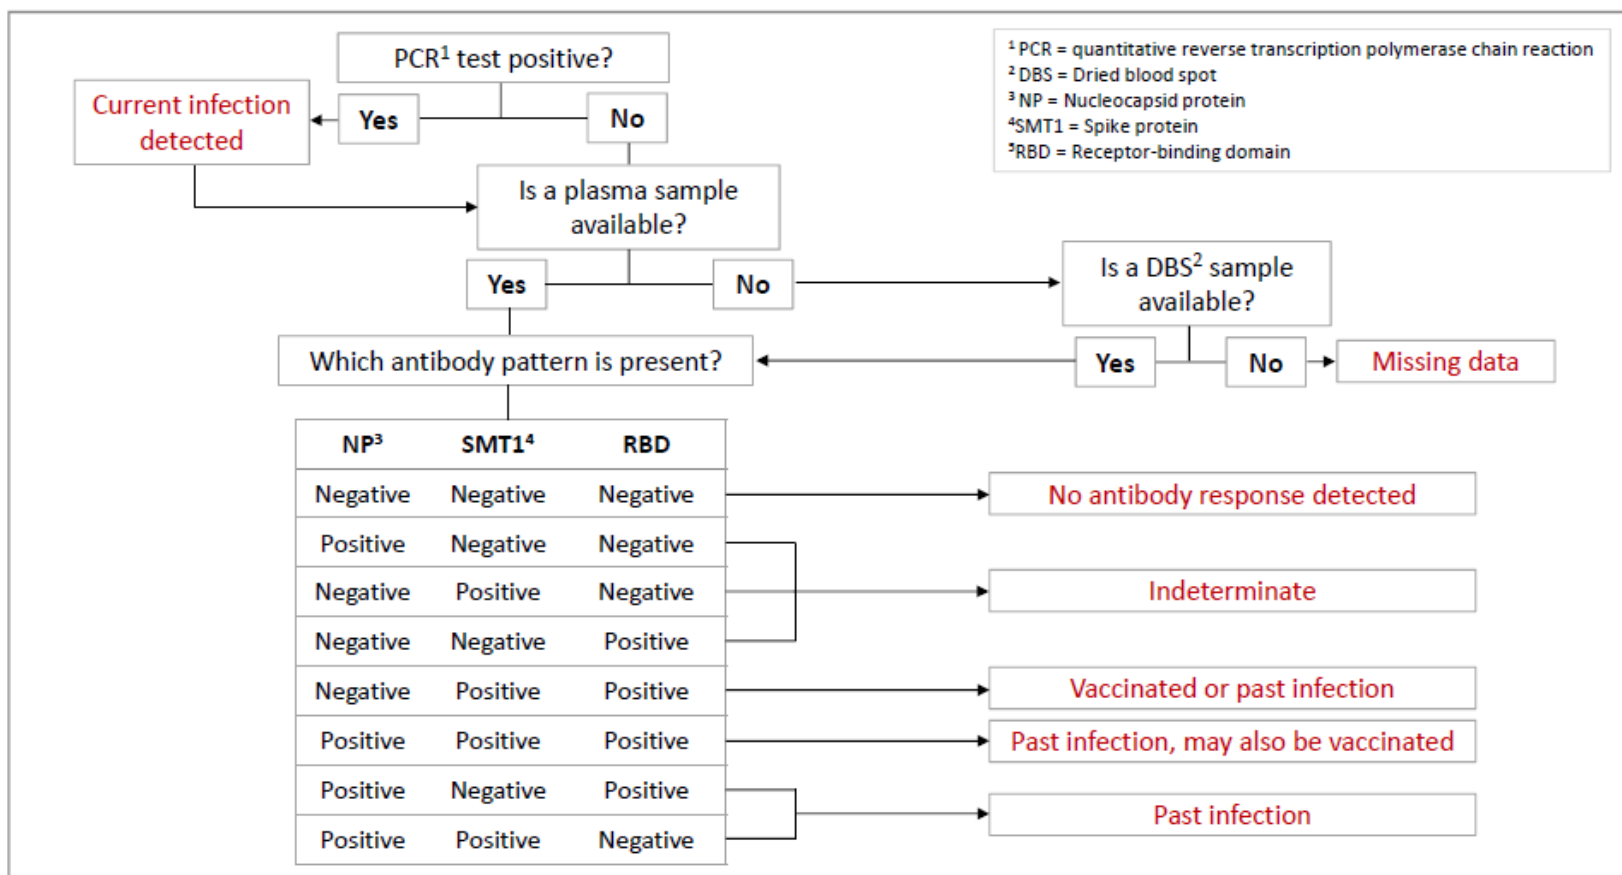

**Step 2 – Decision matrix to combine serological results and self-report data to assign past infection and vaccination status**

| Serological results<br>(See Step 1)    | Self-reported Infection<br>history <sup>1</sup> | Self-reported Vaccination<br>History <sup>2</sup> | Final infection status | Final vaccination status |
|----------------------------------------|-------------------------------------------------|---------------------------------------------------|------------------------|--------------------------|
| No antibody response                   | No positive test <sup>3</sup>                   | Zero doses                                        | No past infection      | No past vaccination      |
| No antibody response                   | No positive test                                | 1+ doses                                          | No past infection      | Past vaccination         |
| No antibody response                   | Positive test                                   | Zero doses                                        | Past infection         | No past vaccination      |
| No antibody response                   | Positive test                                   | 1+ doses                                          | Past infection         | Past vaccination         |
| Indeterminate                          | No positive test                                | Zero doses                                        | No past infection      | No past vaccination      |
| Indeterminate                          | No positive test                                | 1+ doses                                          | No past infection      | Past vaccination         |
| Indeterminate                          | Positive test                                   | Zero doses                                        | Past infection         | No past vaccination      |
| Indeterminate                          | Positive test                                   | 1+ doses                                          | Past infection         | Past vaccination         |
| Vaccinated or past infection           | No positive test                                | Zero doses                                        | Past infection         | No past vaccination      |
| Vaccinated or past infection           | No positive test                                | 1+ doses                                          | No past infection      | Past vaccination         |
| Vaccinated or past infection           | Positive test                                   | Zero doses                                        | Past infection         | No past vaccination      |
| Vaccinated or past infection           | Positive test                                   | 1+ doses                                          | Past infection         | Past vaccination         |
| Past infection, may also be vaccinated | No positive test                                | Zero doses                                        | Past infection         | No past vaccination      |
| Past infection, may also be vaccinated | No positive test                                | 1+ doses                                          | Past infection         | Past vaccination         |
| Past infection, may also be vaccinated | Positive test                                   | Zero doses                                        | Past infection         | No past vaccination      |
| Past infection, may also be vaccinated | Positive test                                   | 1+ doses                                          | Past infection         | Past vaccination         |
| Past infection                         | No positive test                                | Zero doses                                        | Past infection         | No past vaccination      |
| Past infection                         | No positive test                                | 1+ doses                                          | Past infection         | Past vaccination         |
| Past infection                         | Positive test                                   | Zero doses                                        | Past infection         | No past vaccination      |
| Past infection                         | Positive test                                   | 1+ doses                                          | Past infection         | Past vaccination         |
| Missing data                           | Any response                                    | Any response                                      | Missing                | Missing                  |

<sup>1</sup> All records linked at ICES will be cross-referenced against testing events in the OLIS database.

<sup>2</sup> All records linked at ICES will be cross-referenced against vaccination events recorded in the COVAXON database.

<sup>3</sup> 'No positive test' includes those who: were never tested; do not recall whether they were tested; were tested and received only negative results; or were tested but did not know their test result
